# Supplementary material
Source: PubMed Central journal article supplement (PMC2577273)
Supplement: pp.108.127605_1.pdf [file pp.108.127605_1.pdf]

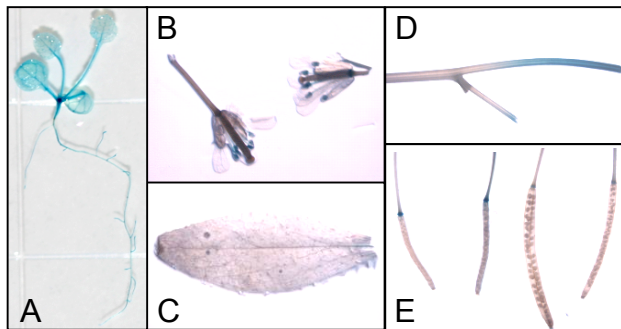

**Figure S1.** KEG is expressed in all tissues of seedlings, but is not in mature leaves. KEG promoter–GUS expression in transgenic Col-0 T1 plants. A, 8 day old seedlings. B, flower. C, rosette leaf. D, stem and E, silique from 7 week-old plant.
