# Supplementary material
Source: PubMed Central journal article supplement (PMC2577273)
Supplement: pp.108.127605_2.pdf [file pp.108.127605_2.pdf]

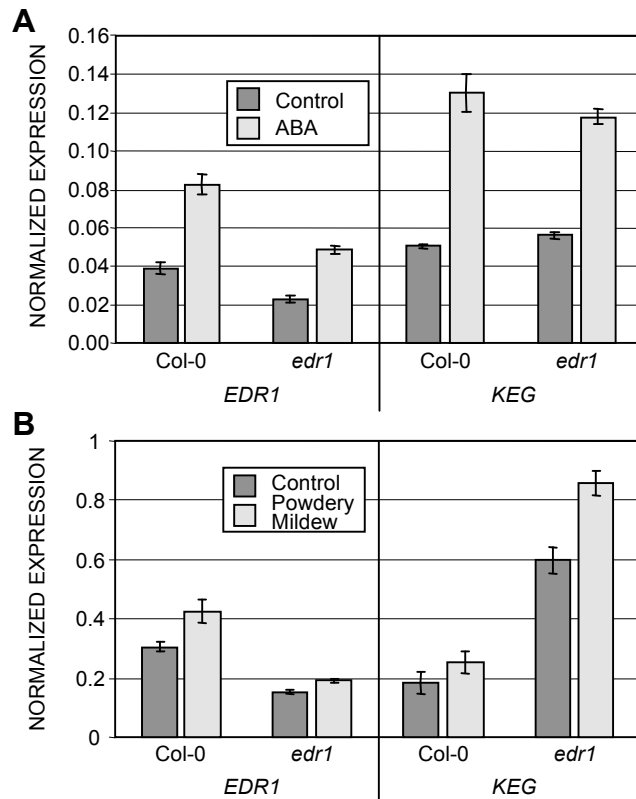

**Figure S2.** *EDR1* and *KEG* are induced by ABA and powdery mildew. A, RNA was isolated from 8 day old seedlings treated with 100 $\mu$ M ABA for 3 h. B, RNA was isolated from 5 week old plants 30 hrs after inoculation with powdery mildew. Shown is the average and SD of three biological replicates from independent experiments.
