# Supplementary material
Source: PubMed Central journal article supplement (PMC2577273)
Supplement: pp.108.127605_3.pdf [file pp.108.127605_3.pdf]

**Table S1.** Oligonucleotides used for qRT-PCR.

| AGI number | Gene name                    | Oligonucleotide (5'-3') |                       | Product size |
|------------|------------------------------|-------------------------|-----------------------|--------------|
|            |                              | left                    | right                 |              |
| At1g08720  | EDR1                         | GAGGTGGGAATCAAGAGCAG    | GTGACTGACGAAGGGGT G   | 112bp        |
| At5g13530  | KEG                          | TGTTTTGGAGGGAGACTT TGA  | GTGAAGAGCCGATTGACCAT  | 124bp        |
| At4g17500  | ERF1                         | GAGATTTGCCGTTGAAAGAA    | GTCGGAAGACGAAGAAGACG  | 104bp        |
| At5g57560  | TCH4(XET)                    | CATGGGACCTACGCCTACC     | TTCTTCCCTCGAAAGCTCAA  | 121bp        |
| At5g52310  | RD29A                        | AGCATCGGAGGAGGGTGAG     | AATGTGGCGATTCTGGCTTC  | 130bp        |
| At2g36270  | ABI5                         | GAGGGTGGTGTGGTGTCTT     | TACAAAGCGGAGCTGGAAGT  | 127bp        |
| At3g45640  | MPK3                         | CGCTTATTGACAGAGTTGCTTG  | CGTGGGAAGTTGGGAAGTTG  | 104bp        |
| At5g19770  | TUA3<br>( $\alpha$ -tubulin) | GTATTGAACGCATCGTGTG     | TGGGAGCTTTACTGTCTCGAA | 86bp         |
